# Supplementary material for: Co-delivery of paclitaxel and gemcitabine via a self-assembling nanoparticle for targeted treatment of breast cancer
Source: PubMed Central journal article supplement (PMC9060788; doi:10.1039/c9ra00276f), 2019-02-13
Supplement: RA-009-C9RA00276F-s001.pdf [file RA-009-C9RA00276F-s001.pdf]

## Supporting Information

### Co-delivery of paclitaxel and gemcitabine via a self-assembly nanoparticle for targeting treatment of breast cancer

Meng Lei<sup>a</sup>, Sijia Sha<sup>a</sup>, Xueyuan Wang<sup>b</sup>, Jia Wang<sup>d</sup>, Xiao Du<sup>c,\*</sup>, Hang Miao<sup>a</sup>, Hui Zhou<sup>b</sup>, Enhe Bai<sup>b</sup>, Jingmiao Shi<sup>d</sup>, Yongqiang Zhu<sup>b,\*</sup>

<sup>a</sup> College of Science, Nanjing Forestry University, No. 159 Longpan Road, Nanjing 210037, PR China

<sup>b</sup> College of Life Science, Nanjing Normal University, No. 1 Wenyuan Road, Nanjing 210037, PR China

<sup>c</sup> Department of Pharmaceutics, School of Pharmacy, China Pharmaceutical University, Nanjing 210009, PR China

<sup>d</sup> Jiangsu Chia Tai Fenghai Pharmaceutical Co. Ltd., No. 9 Weidi Road, Nanjing 210046, PR China

E-mail: [zhyqscu@hotmail.com](mailto:zhyqscu@hotmail.com); [duxiaojianai@126.com](mailto:duxiaojianai@126.com)

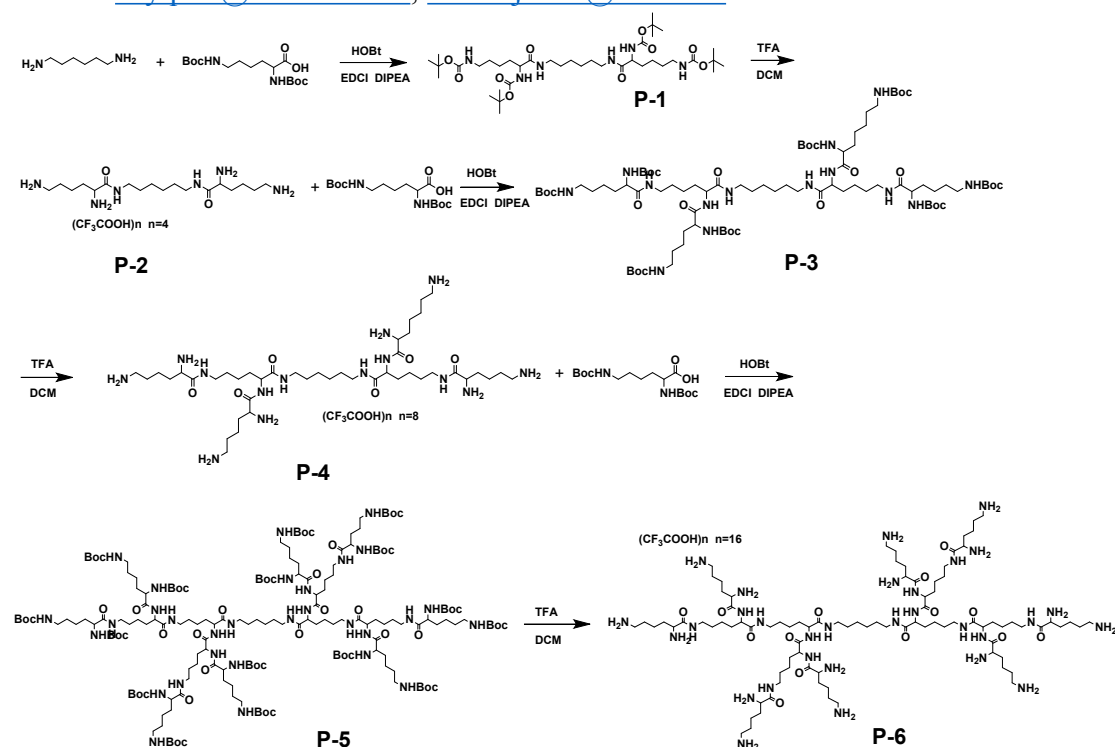

Fig. S1 Synthesis of P-6.

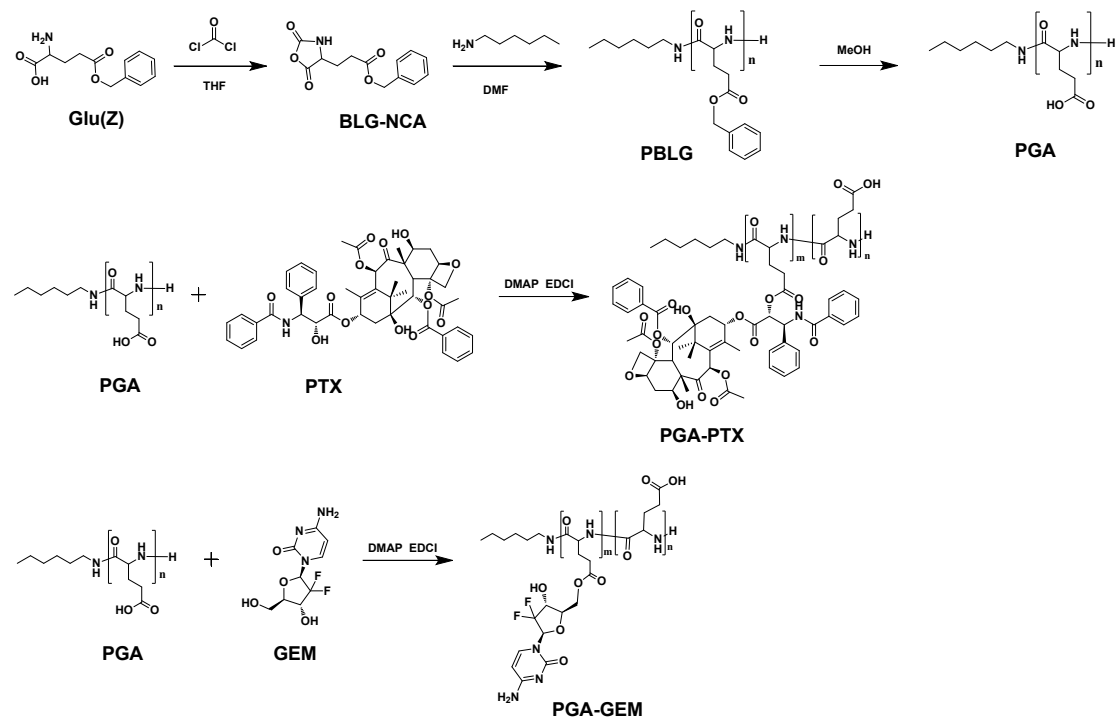

Fig. S2 Synthesis of PGA, PGA-PTX and PGA-GEM.

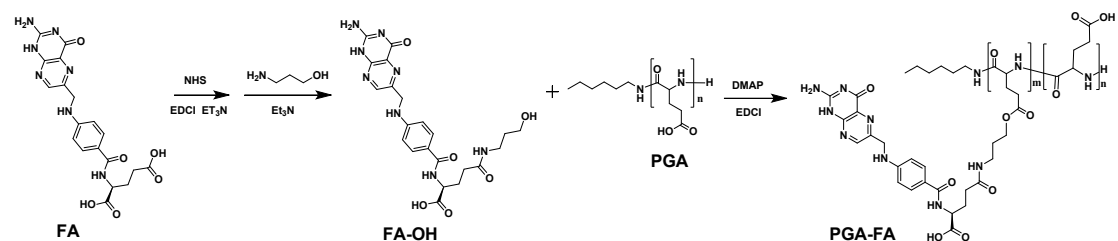

Fig. S3 Synthesis of PGA-FA.

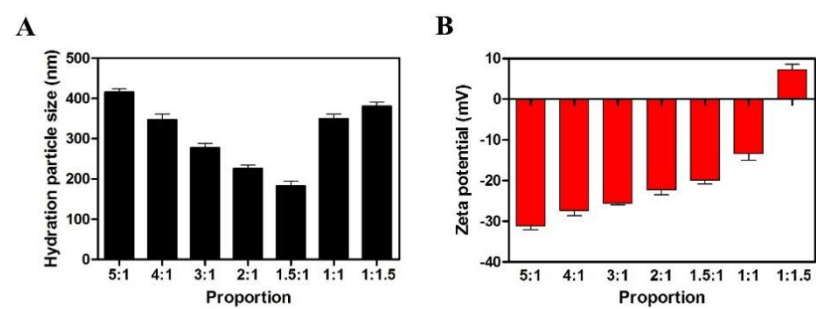

Fig. S4 Hydration particle size (A), and zeta potential (B) of different proportions in MF-FA NPs.
